# Supplementary material for: MACHETE identifies interferon-encompassing chromosome 9p21.3 deletions as mediators of immune evasion and metastasis
Source: PubMed Central journal article supplement (PMC9701143; doi:10.1038/s43018-022-00443-5), 2022-11-07

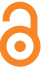

---

# **MACHETE identifies interferon-encompassing chromosome 9p21.3 deletions as mediators of immune evasion and metastasis**

---

In the format provided by the authors and unedited

# Supplementary Figure 1

## Lymphoid panel

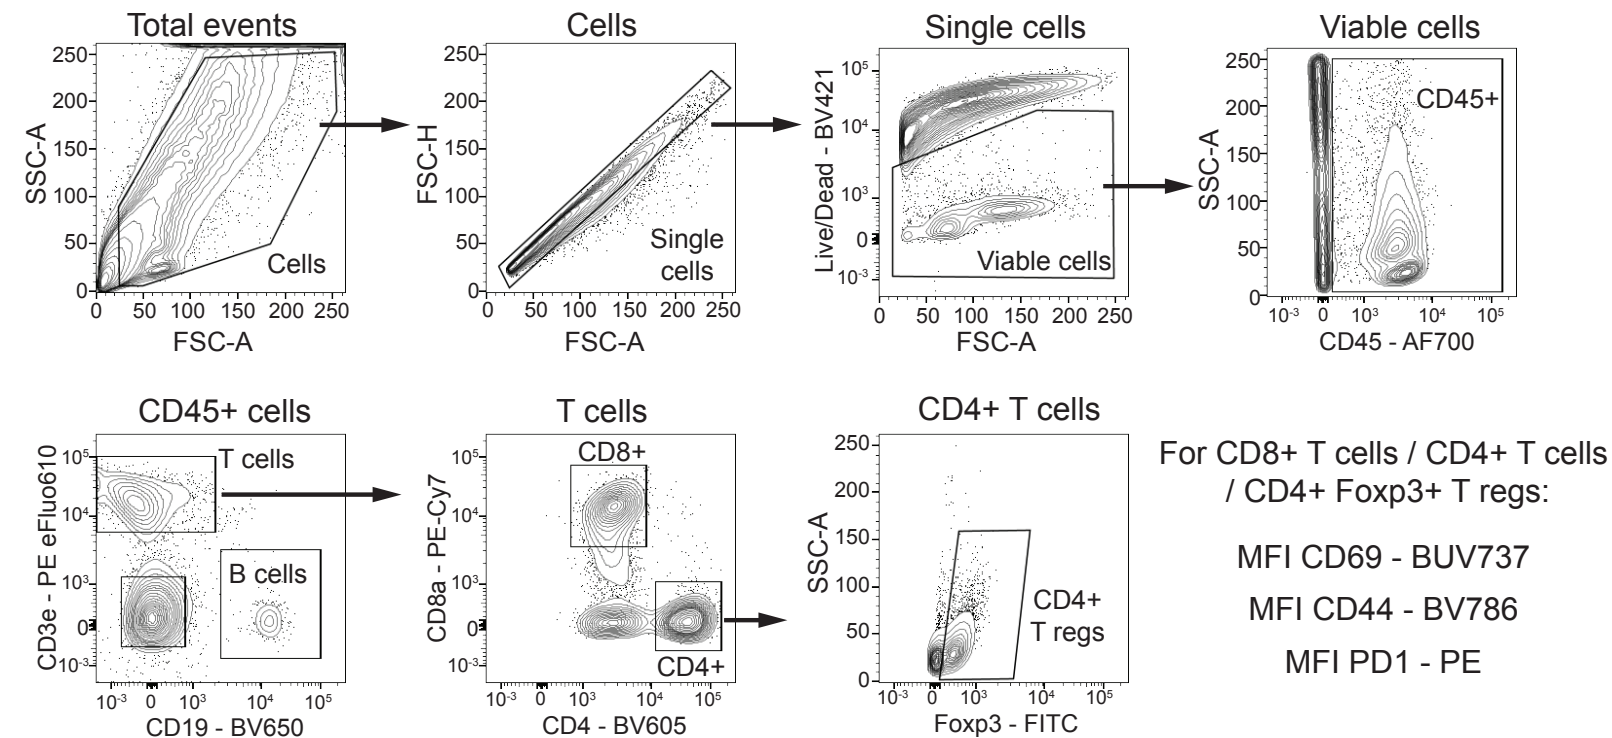

## Myeloid panel

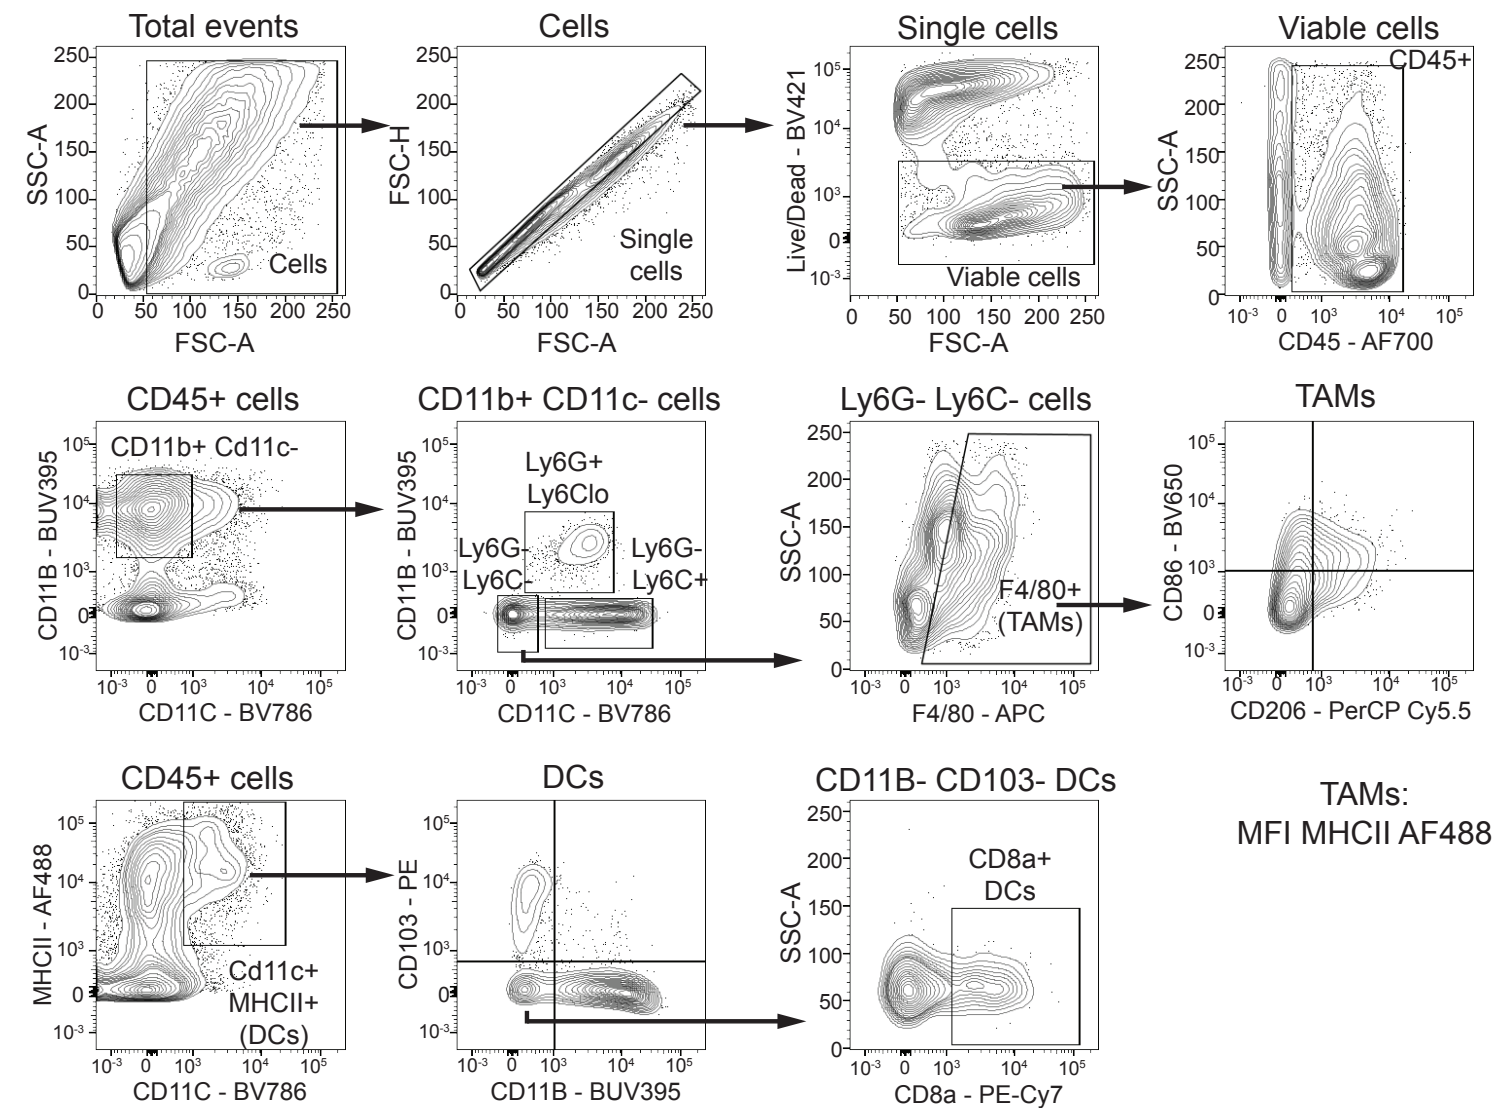

Supplement: 43018_2022_443_MOESM1_ESM.pdf [file 43018_2022_443_MOESM1_ESM.pdf]
