# Supplementary material for: MACHETE identifies interferon-encompassing chromosome 9p21.3 deletions as mediators of immune evasion and metastasis
Source: PubMed Central journal article supplement (PMC9701143; doi:10.1038/s43018-022-00443-5), 2022-11-07

Figure 1D  
KI PCR

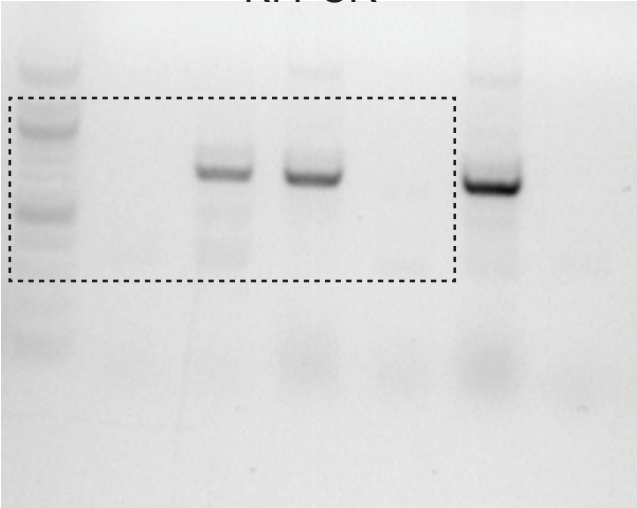

Figure 1D  
 $\Delta 11B3$  PCR

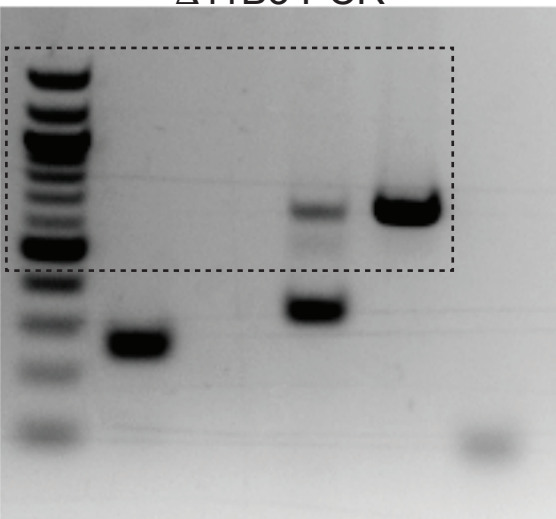

Figure 1I  
Cassette PCR

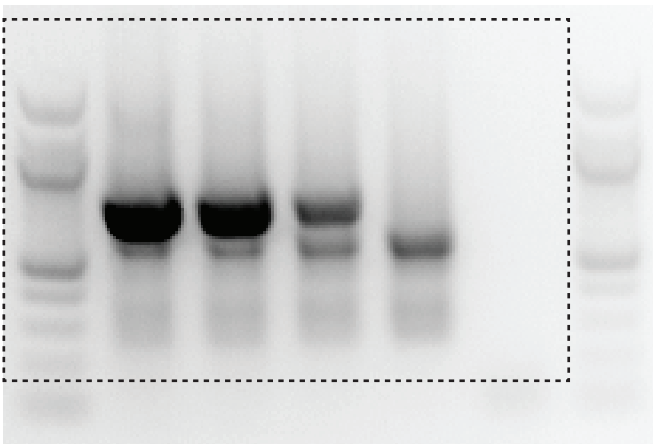

Figure 1I  
 $\Delta 7q11-22$  PCR

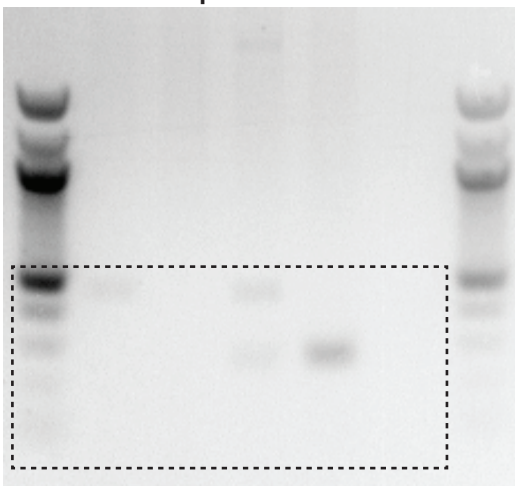

Supplement: 43018_2022_443_MOESM20_ESM.pdf [file 43018_2022_443_MOESM20_ESM.pdf]
