# Supplementary material for: MACHETE identifies interferon-encompassing chromosome 9p21.3 deletions as mediators of immune evasion and metastasis
Source: PubMed Central journal article supplement (PMC9701143; doi:10.1038/s43018-022-00443-5), 2022-11-07

Figure ED 2G  
 $\Delta$ L-A PCR

Figure ED 2G  
 $\Delta$ L-B PCR

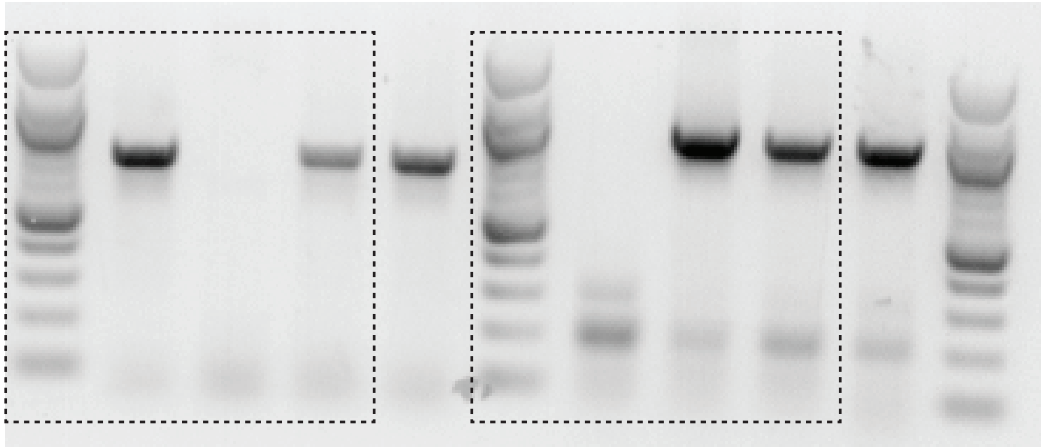

Supplement: 43018_2022_443_MOESM24_ESM.pdf [file 43018_2022_443_MOESM24_ESM.pdf]
